# Supplementary material
Source: PubMed Central journal article supplement (PMC2824138)
Supplement: mmc1.pdf [file mmc1.pdf]

Multiple-dose activated charcoal in acute self-poisoning: a randomised controlled trial

Correspondence to: Michael Eddleston, Scottish Poisons Information Bureau, New Royal Infirmary, 51 Little France, Edinburgh EH16 4SA, UK eddlestonm@yahoo.com

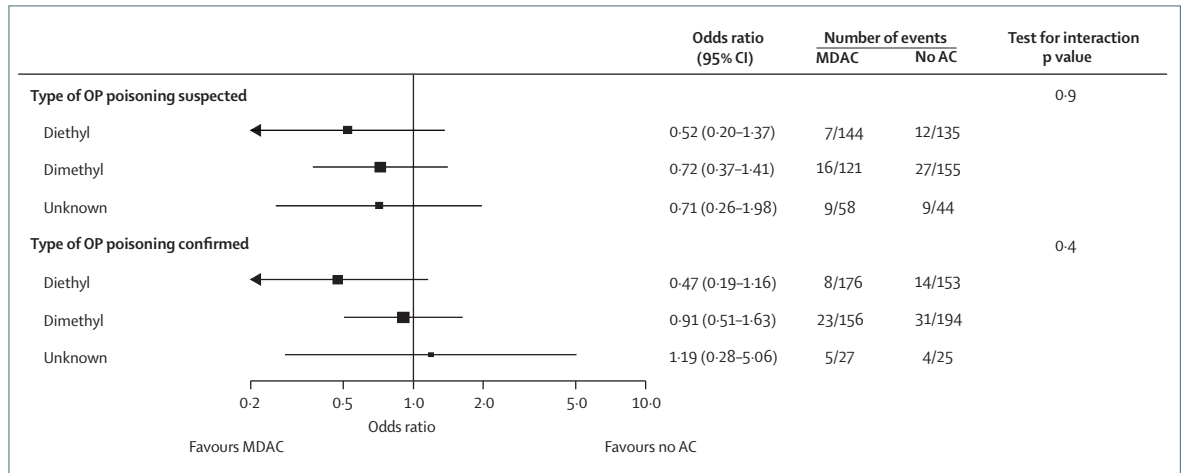

Webfigure 1: Subgroup analysis of diethyl organophosphorus versus dimethyl organophosphorus poisoning (mortality for multiple-dose activated charcoal vs no activated charcoal)  
MDAC= multiple-dose activated charcoal. AC=activated charcoal. OP=organophosphorus.
