# Supplementary material
Source: PubMed Central journal article supplement (PMC2824138)
Supplement: mmc2.pdf [file mmc2.pdf]

Multiple-dose activated charcoal in acute self-poisoning: a randomised controlled trial

Correspondence to: Michael Eddleston, Scottish Poisons Information Bureau, New Royal Infirmary, 51 Little France, Edinburgh EH16 4SA, UK [eddelestonm@yahoo.com](mailto:eddelestonm@yahoo.com)

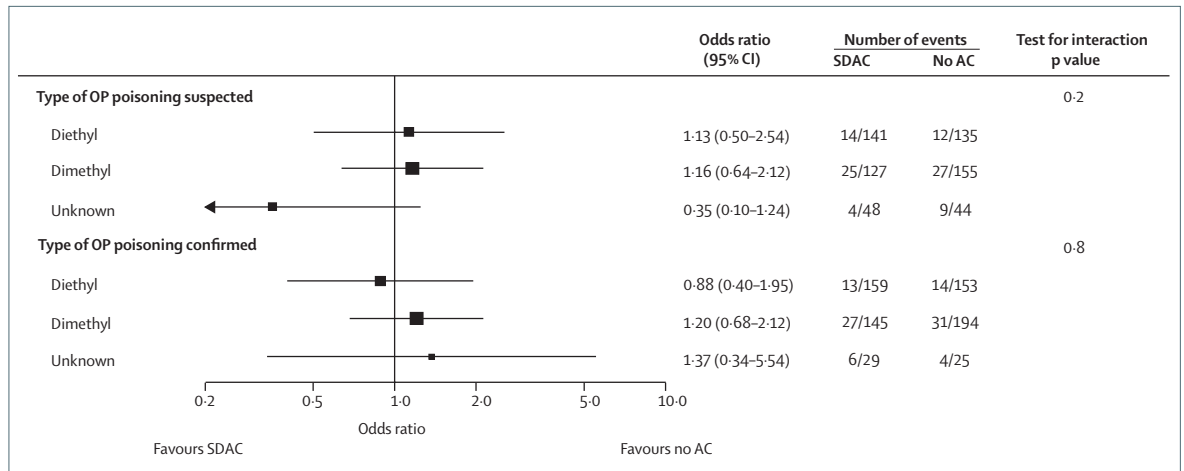

**Webfigure 2: Subgroup analysis of diethyl organophosphorus versus dimethyl organophosphorus poisoning (mortality for single-dose activated charcoal vs no activated charcoal)**  
 SDAC=single-dose activated charcoal. AC=activated charcoal. OP=organophosphorus.
