# Supplementary material
Source: PubMed Central journal article supplement (PMC2824138)
Supplement: mmc3.pdf [file mmc3.pdf]

Multiple-dose activated charcoal in acute self-poisoning: a randomised controlled trial

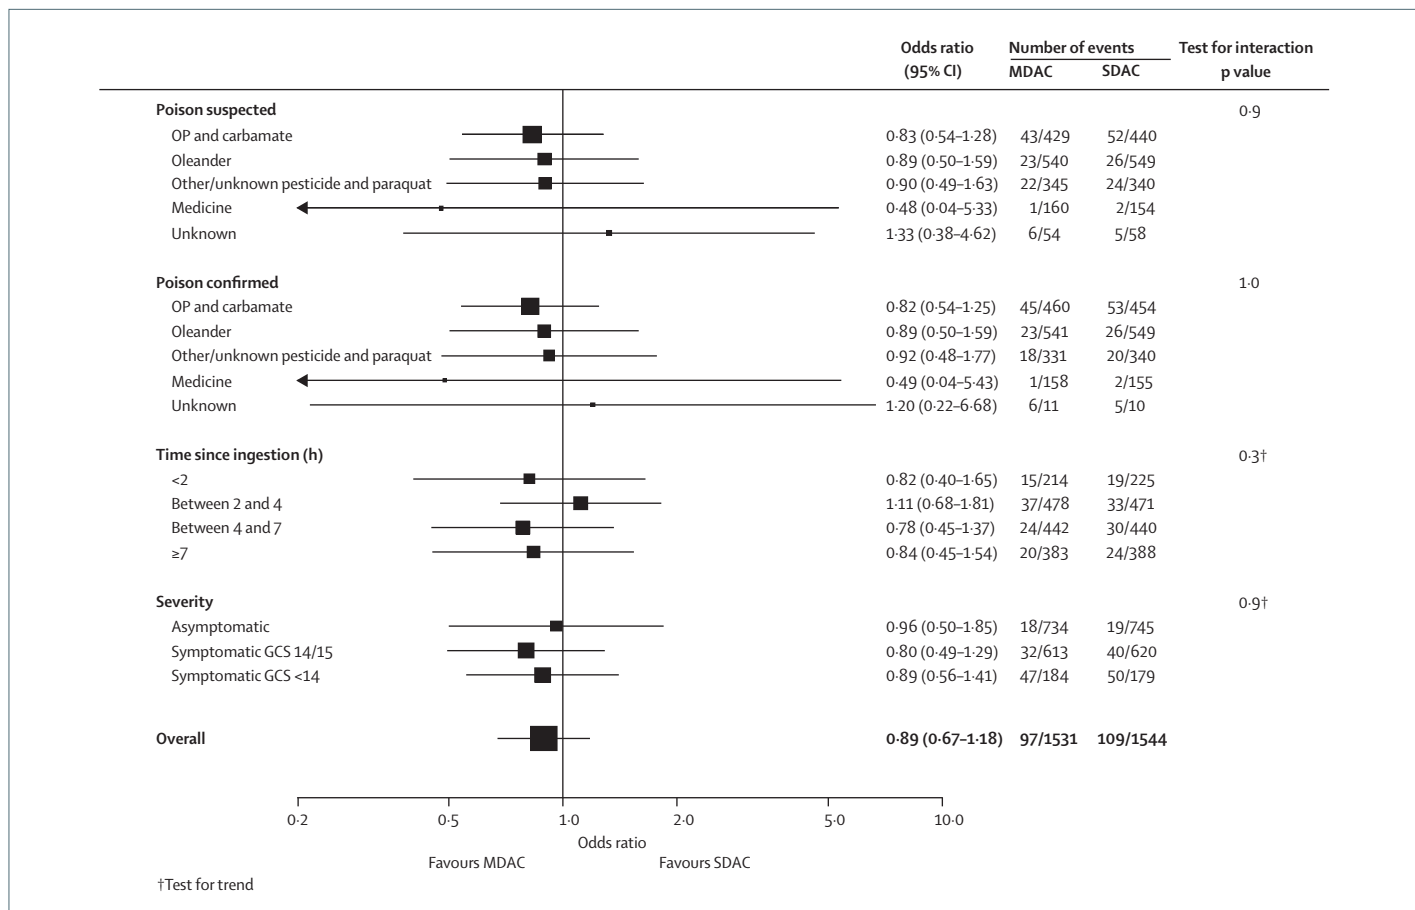

Webfigure 3: Forest plot of mortality for multiple-dose activated charcoal versus single-dose activated charcoal

MDAC=multiple-dose activated charcoal. SDAC=single-dose activated charcoal. OP=organophosphorus. GCS=Glasgow coma score. \*Test for trend.

Correspondence to:  
 Michael Eddleston, Scottish  
 Poisons Information Bureau,  
 New Royal Infirmary, 51 Little  
 France, Edinburgh EH16 4SA, UK  
 eddlestonm@yahoo.com
