# Supplementary material
Source: PubMed Central journal article supplement (PMC2824138)
Supplement: mmc4.pdf [file mmc4.pdf]

Multiple-dose activated charcoal in acute self-poisoning: a randomised controlled trial

Correspondence to: Michael Eddleston, Scottish Poisons Information Bureau, New Royal Infirmary, 51 Little France, Edinburgh EH16 4SA, UK eddlestonm@yahoo.com

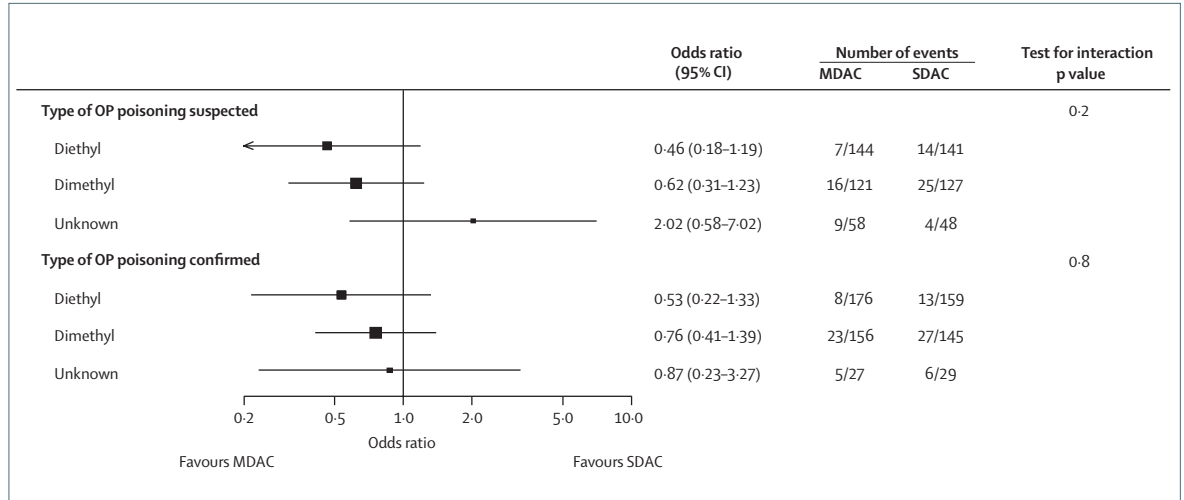

Webfigure 4: Subgroup analysis of diethyl organophosphorus versus dimethyl organophosphorus poisoning (mortality for multiple-dose activated charcoal versus single-dose activated charcoal)  
 MDAC=multiple-dose activated charcoal. SDAC=single-dose activated charcoal. OP=organophosphorus.
